# Supplementary material
Source: PubMed Central journal article supplement (PMC4056645)
Supplement: jn.114.192419_nutrition192419SupplementaryData1.pdf [file jn.114.192419_nutrition192419SupplementaryData1.pdf]

**Supplemental Table 1.** Baseline characteristics of the subjects in the vitamin D<sub>3</sub> intervention study.

|                                    |                   |
|------------------------------------|-------------------|
| Male:Female                        | 35:90             |
| Age, y                             | 59.9 ± 6.5        |
| Weight, kg                         | 72.5 ± 13.3       |
| Height, m                          | 1.64 ± 0.11       |
| BMI, kg/m <sup>2</sup>             | 26.7 ± 4.2        |
| Dietary calcium, mg/d              | 814 ± 413         |
| Dietary vitamin D, µg/d            | 4.4 [2.9, 6.8]    |
| Serum 25(OH)D, nmol/L              | 55.1 ± 20.4       |
| Serum calcium, mmol/L <sup>1</sup> | 2.3 ± 0.1         |
| Serum PTH, pg/mL                   | 46.1 [35.9, 60.3] |

Values are means ± SDs or medians (interquartile ranges; in the case of non-normally distributed parameters), n=125.

<sup>1</sup>Albumin corrected. DBP, vitamin D binding protein. PTH, parathyroid hormone.

Online Supporting Material
